# Supplementary material
Source: ML conference proceedings conference paper supplement (https://openreview.net/forum?id=LR_KWiUgS8F)

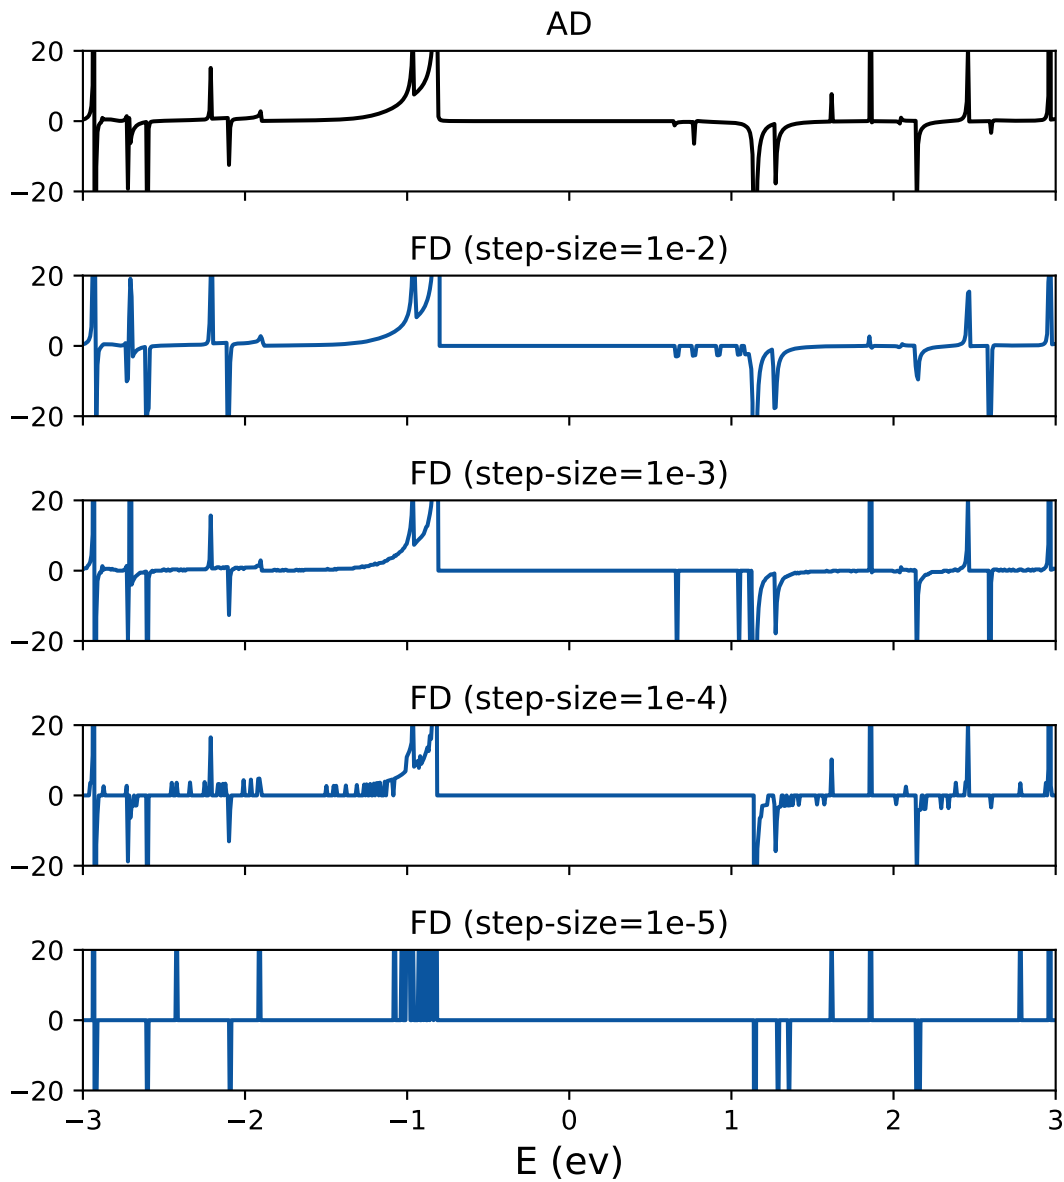

Supplement: supplementary_material [file attachment]

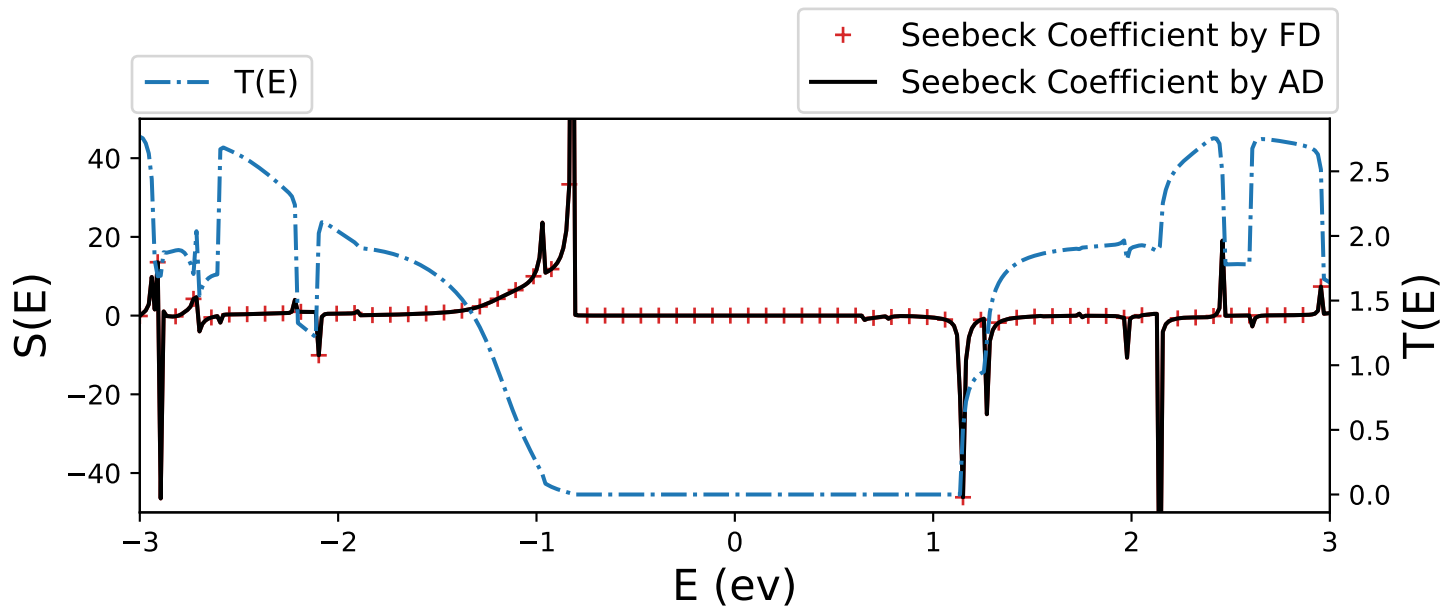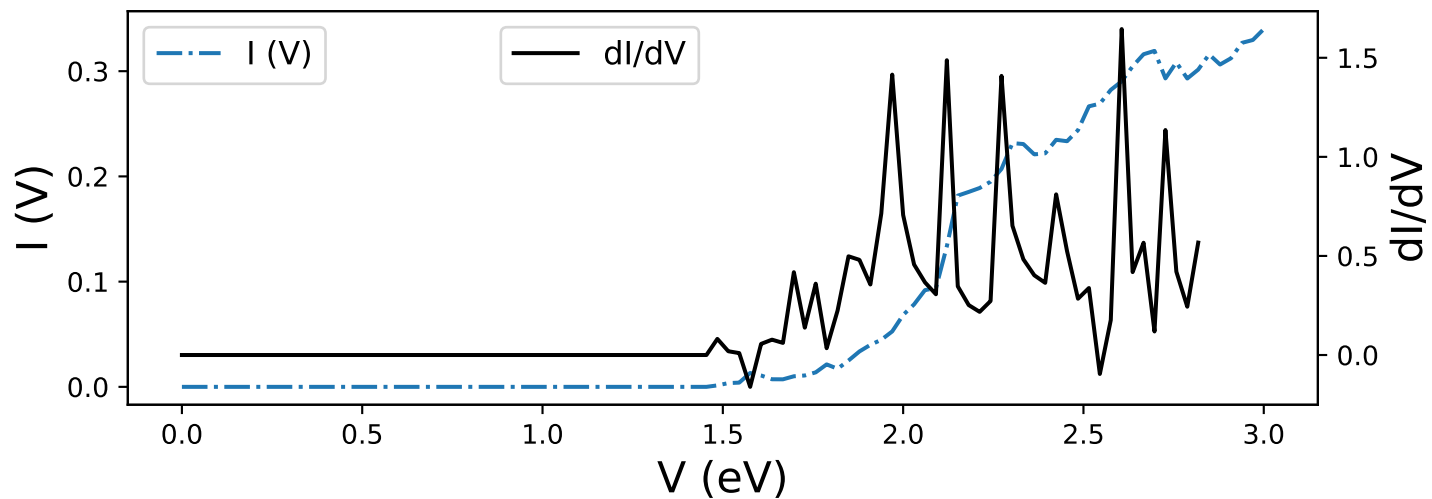

Supplement: supplementary_material [file attachment]

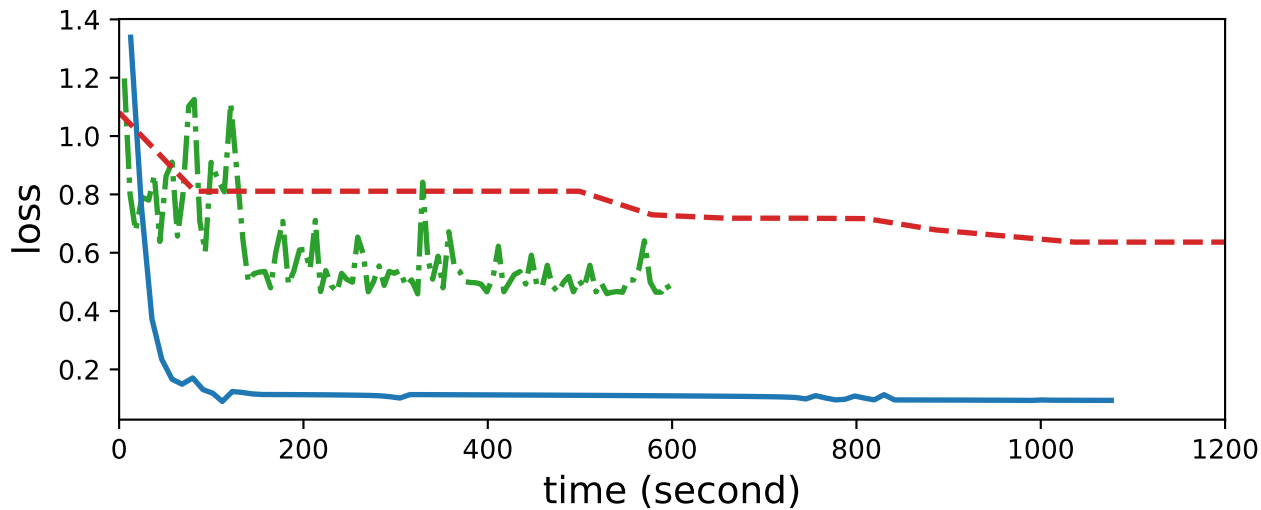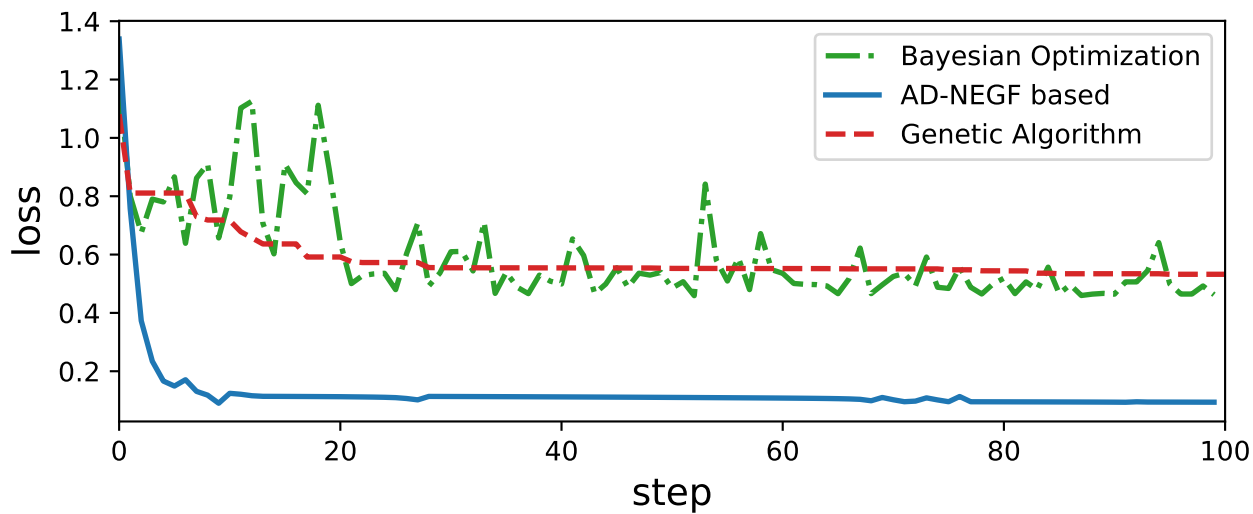

Supplement: supplementary_material [file attachment]

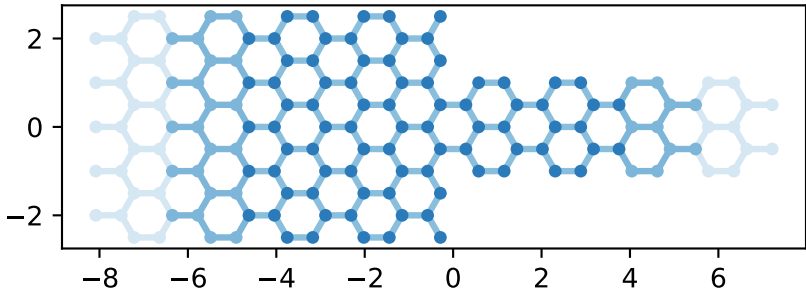

Supplement: supplementary_material [file attachment]

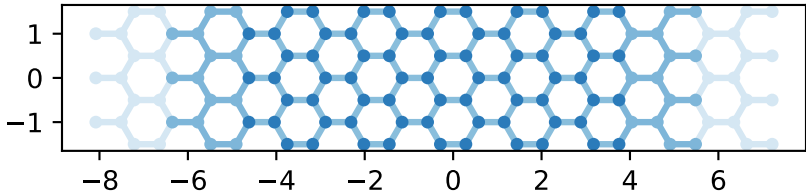

Supplement: supplementary_material [file attachment]

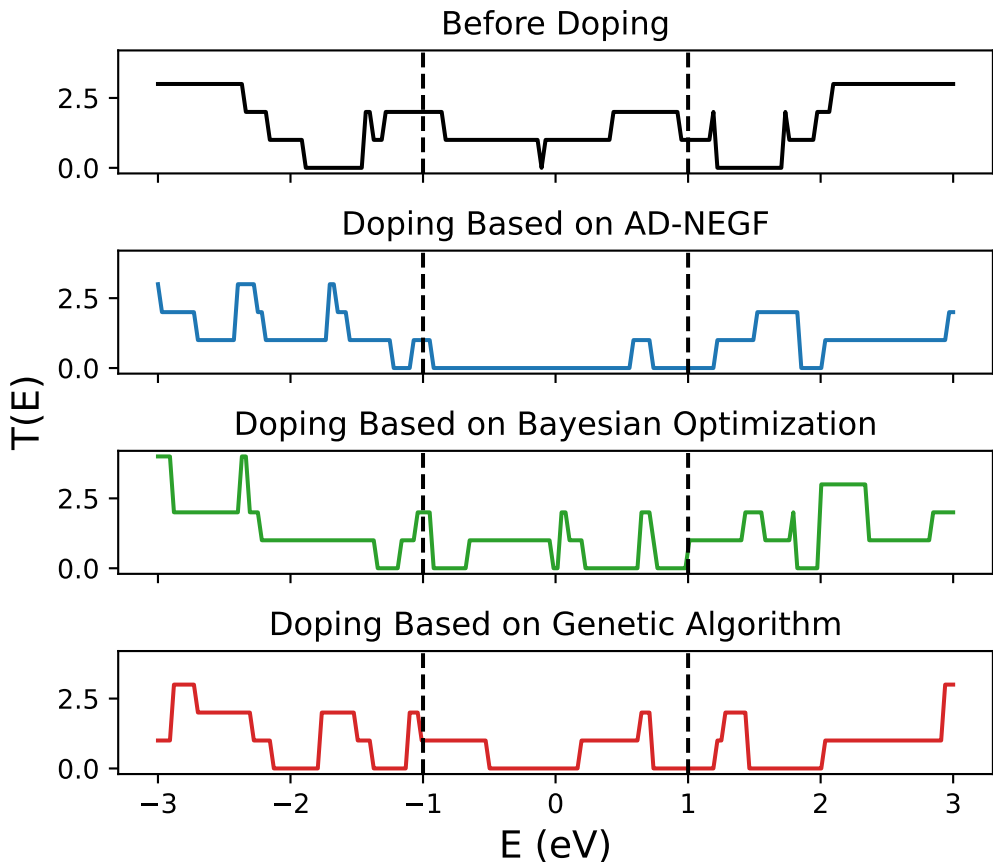

Supplement: supplementary_material [file attachment]

# Transmission of AGNR(7)

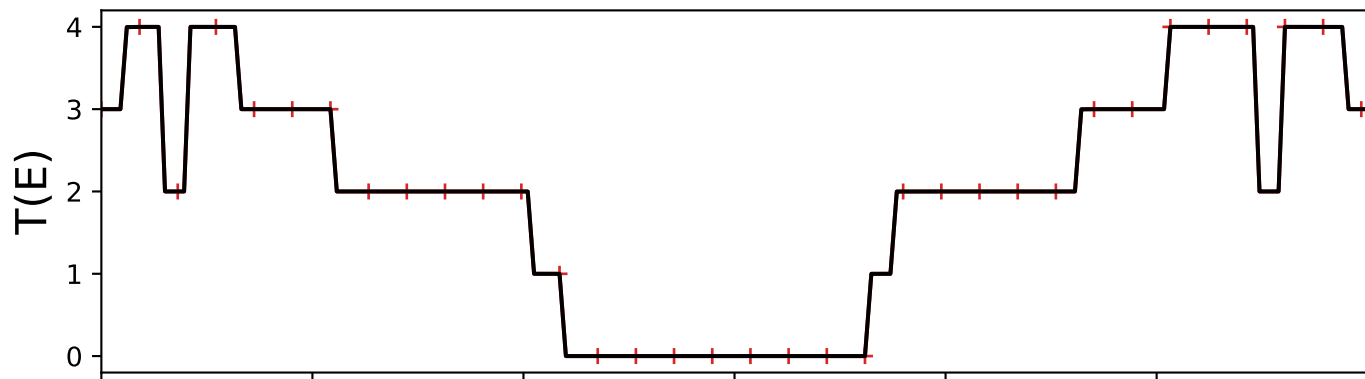

# DOS of AGNR(7)

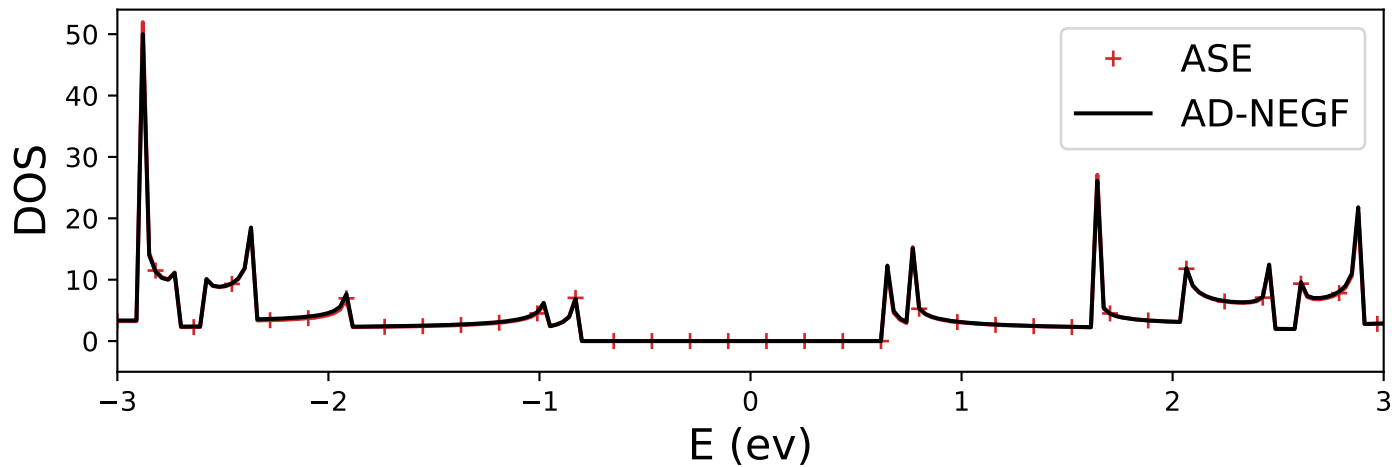

Supplement: supplementary_material [file attachment]

transmission & seebeck under bias voltage of 0~0.5

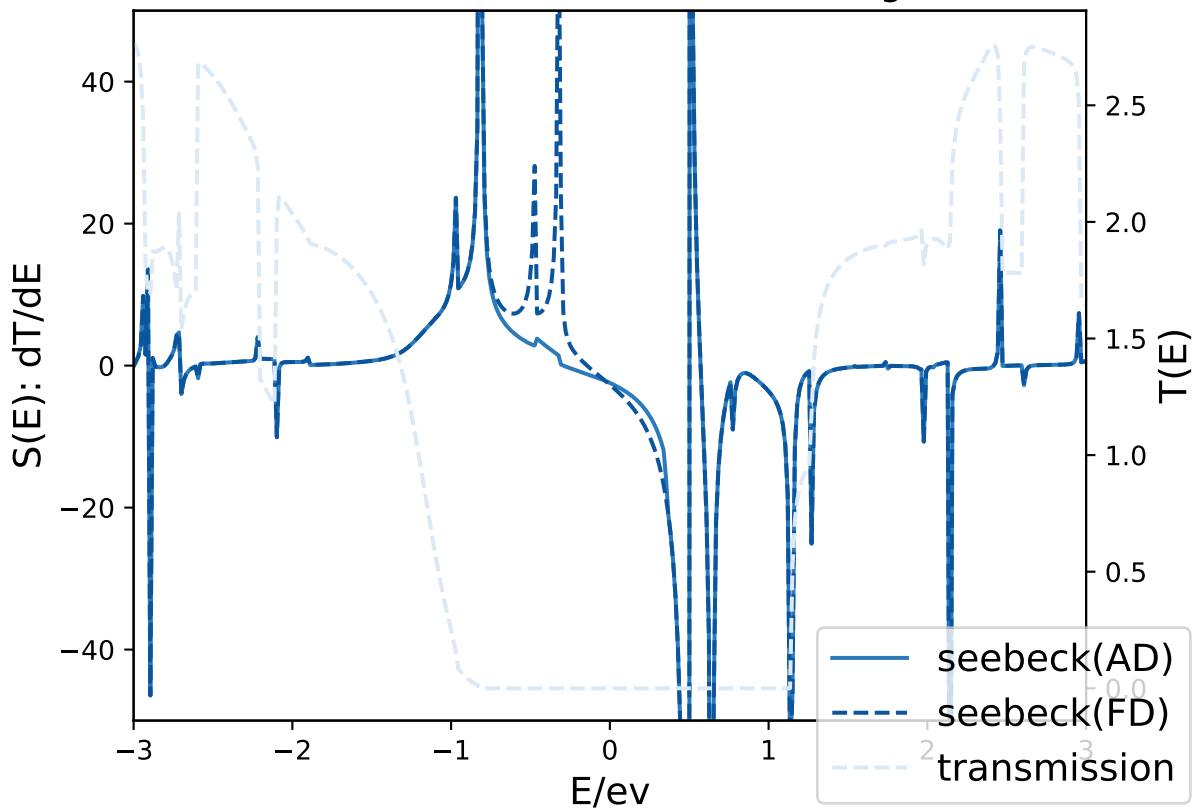

Supplement: supplementary_material [file attachment]

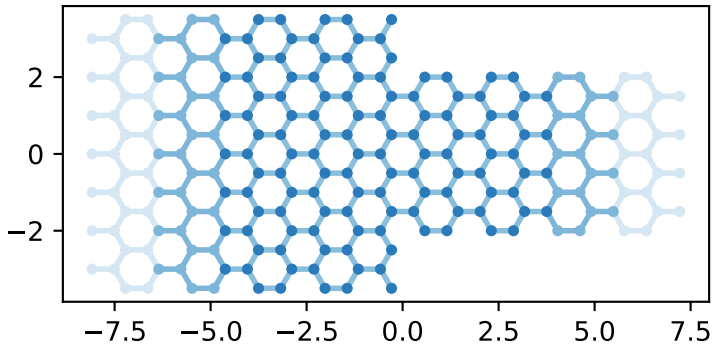

Supplement: supplementary_material [file attachment]

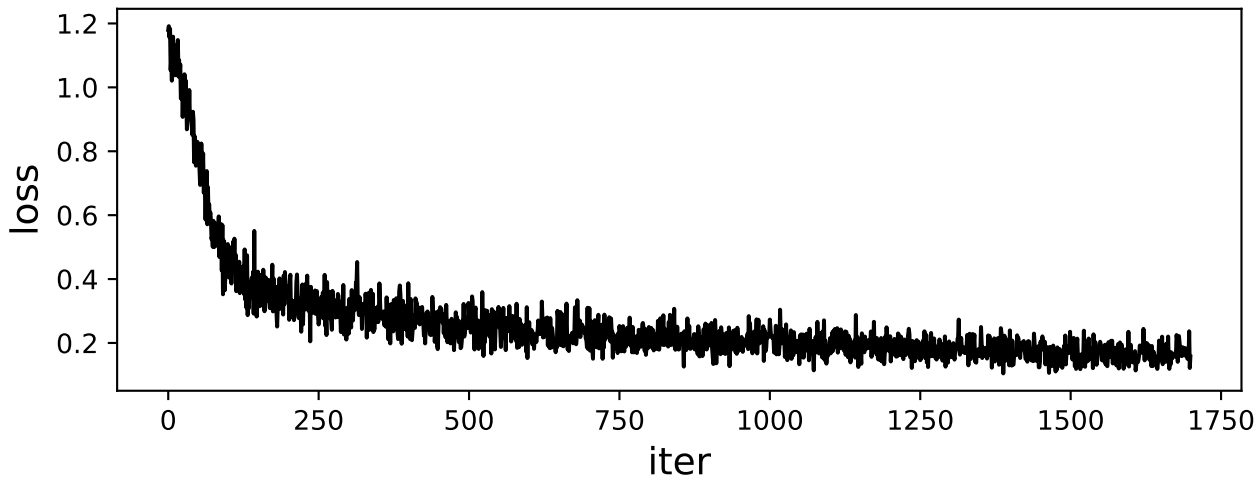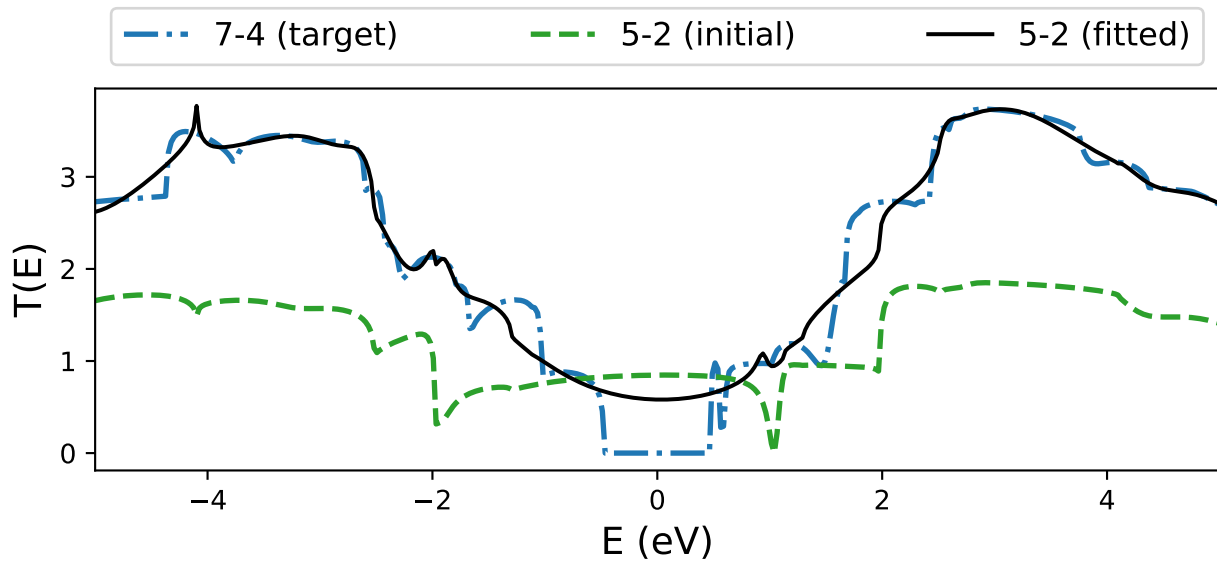

Supplement: supplementary_material [file attachment]
